# Supplementary material for: Accelerated discovery of potential ferroelectric perovskiteviaactive learning
Source: Royal Society of Chemistry journal article supplement (doi:10.1039/d0tc00985g), 2020-01-01
Supplement: d0tc00985g1.pdf [file d0tc00985g1.pdf]

## Supporting Information for

Accelerated discovery of potential ferroelectric perovskite via active learning

Kyoungmin Min<sup>1,\*</sup> and Eunseog Cho<sup>2,\*</sup>

<sup>1</sup>School of Mechanical Engineering, Soongsil University, 369 Sangdo-ro, Dongjak-gu, Seoul, 06978,  
Republic of Korea

<sup>2</sup>Autonomous Material Development Lab, Samsung Advanced Institute of Technology, 130 Samsung-  
ro, Suwon, Gyeonggi-do, 16678, Republic of Korea.

\*Corresponding author: [kmin.min@ssu.ac.kr](mailto:kmin.min@ssu.ac.kr) (K. Min), [eunseog.cho@samsung.com](mailto:eunseog.cho@samsung.com) (E. Cho)

(a)

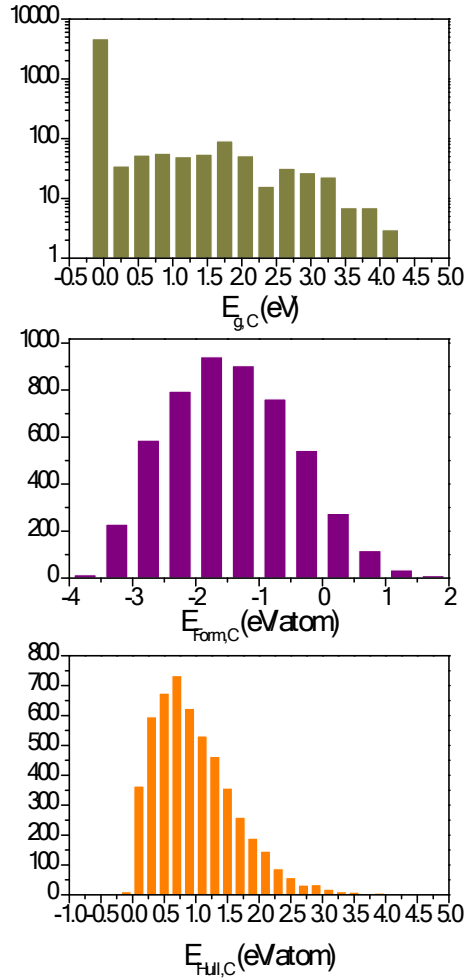

(b)

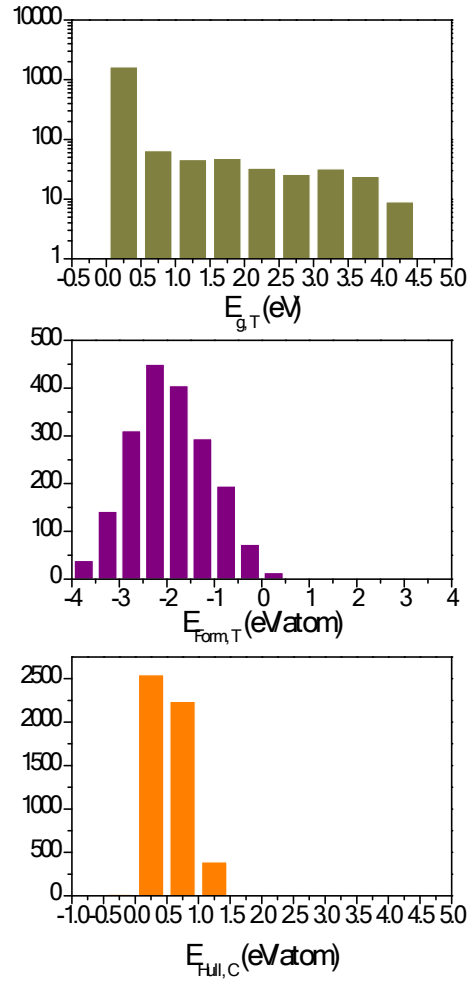

Figure S1. Distribution of band gap ( $E_g$ ), formation energy ( $E_{Form}$ ), and convex hull ( $E_{Hull}$ ) database for (a) cubic and (b) tetragonal phase of  $ABO_3$ .

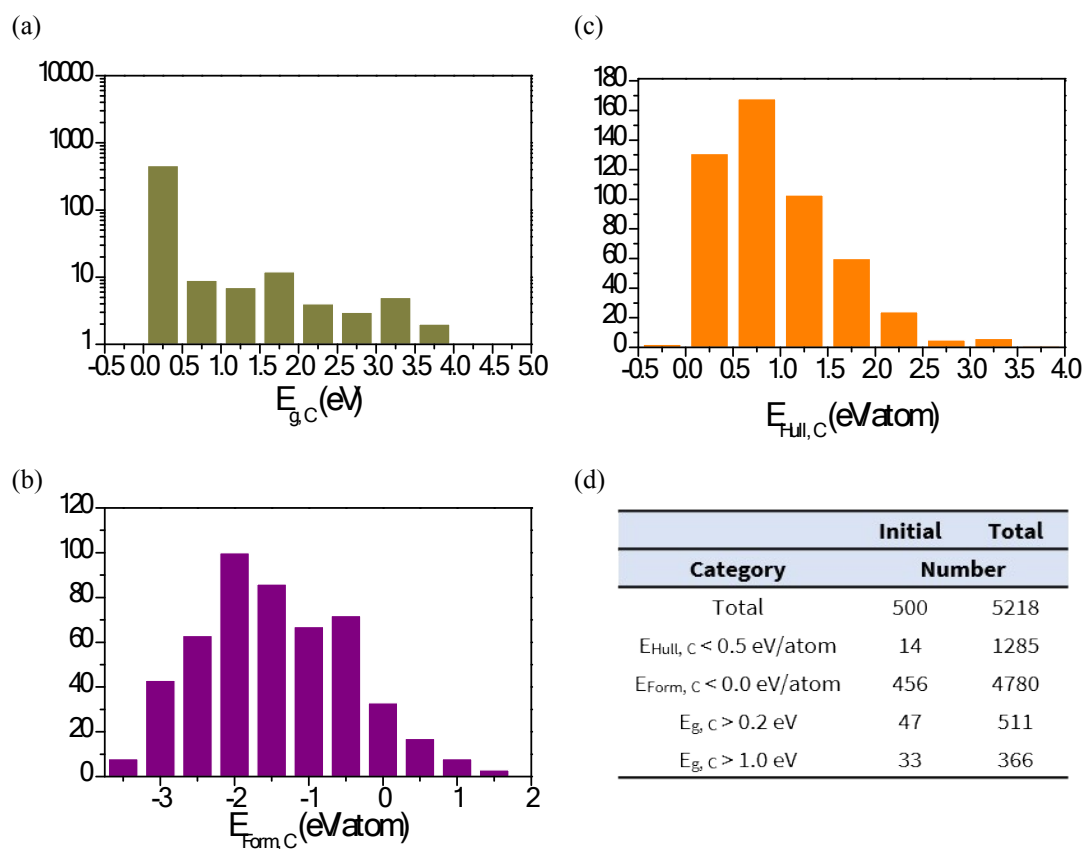

Figure S2. Initial database (500) before applying the active learning process for (a) band gap, (b) formation energy, (c) convex hull energy, and (d) database number satisfying the given condition.

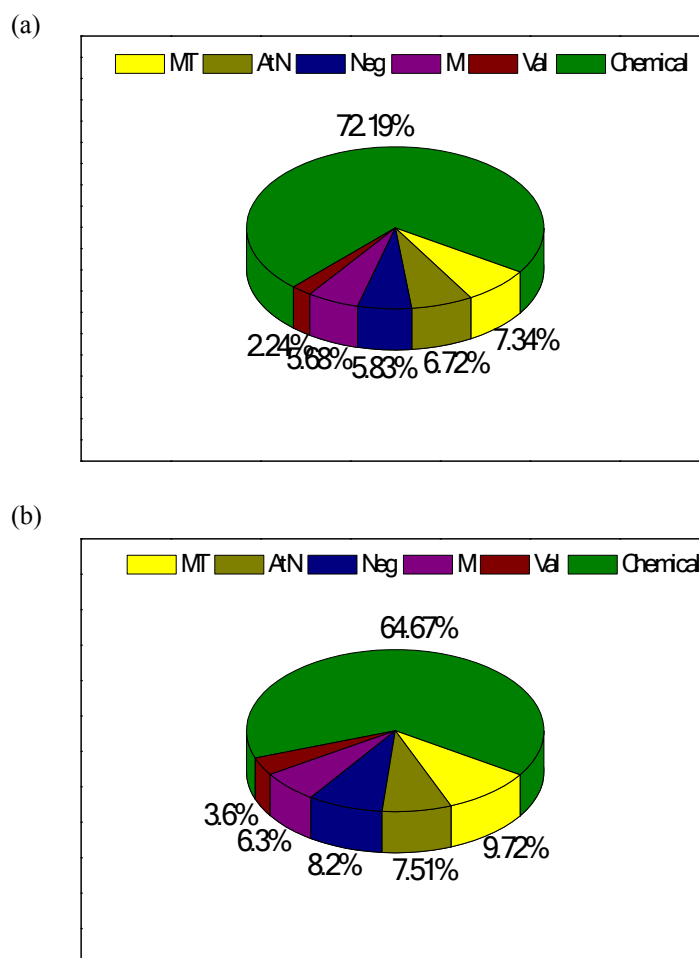

Figure S3. Portion of descriptors in feature importance for prediction model of (a) band gap and (b) formation energy. Each descriptor is abbreviated as follows: melting point (MT), atomic number (AtN), electro-negativity (Neg), Mendeleev number (M), and valence (Val).

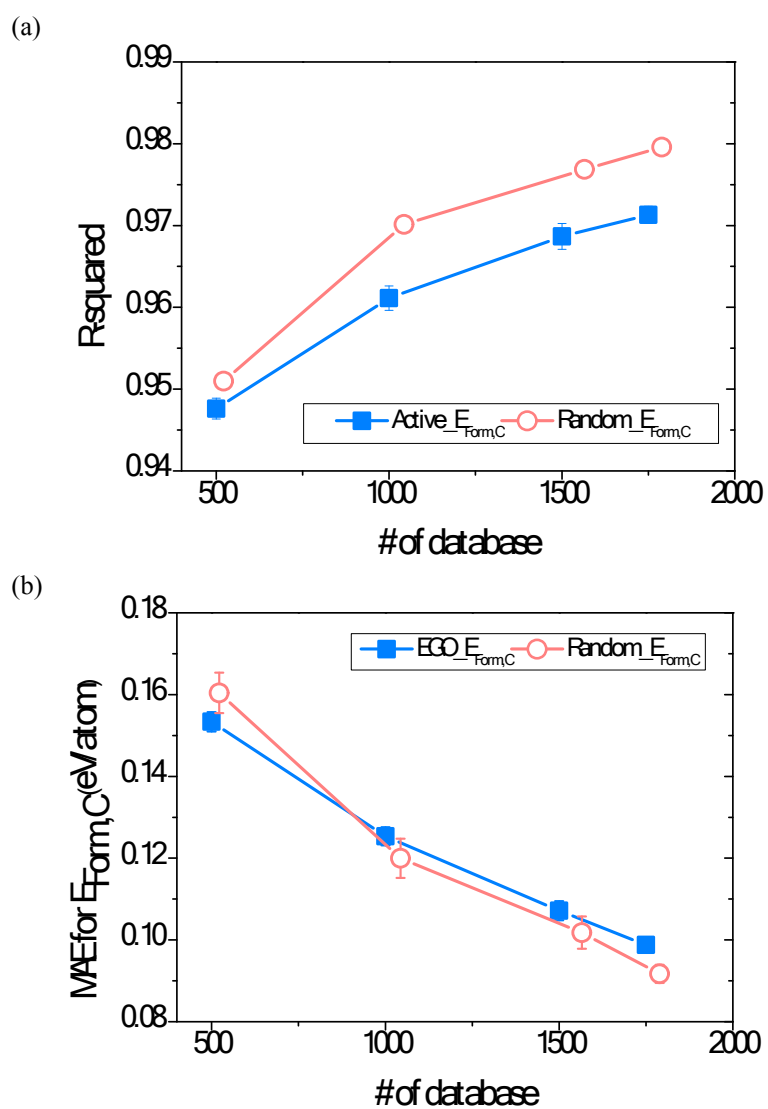

Figure S4. Prediction accuracy change in terms of (a)  $R^2$  and (b) mean absolute error (MAE) with respect to the increase in the database number for the formation energy ( $E_{\text{form,C}}$ ) of the cubic phase. The database is suggested from the active learning for  $E_{g,C}$ .

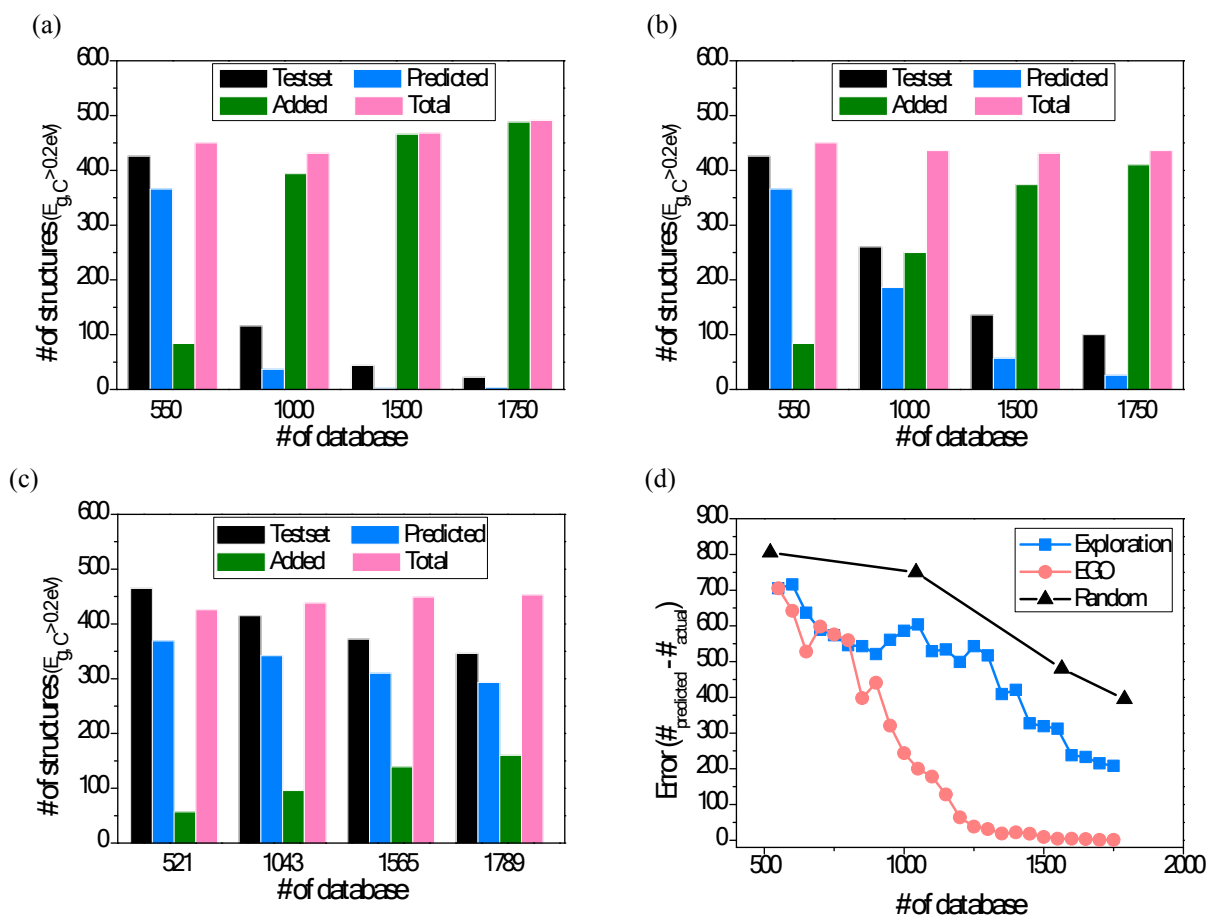

Figure S5. Number of structures satisfying the given condition for the band gap when a new database is added based on (a) EGO, (b) exploration, (c) random active learning, and (d) random selection.

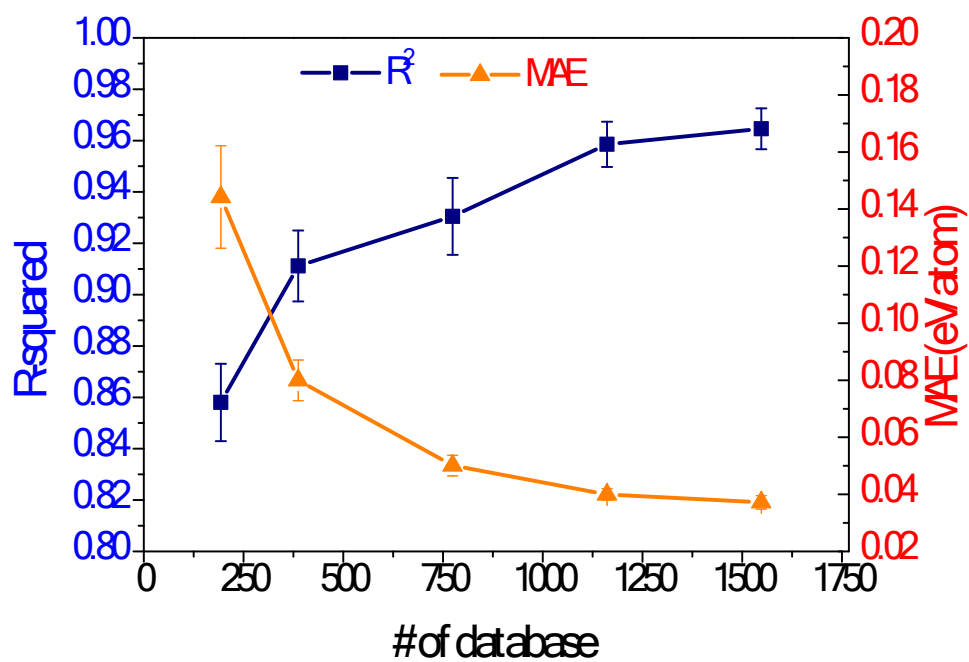

Figure S6. Prediction accuracy for formation energy for tetragonal phase of perovskite with respect to different database number.

| Descriptor                    | Bandgap ( $E_{g,c}$ ) |          | Formation energy ( $E_{\text{Form},c}$ ) |               |
|-------------------------------|-----------------------|----------|------------------------------------------|---------------|
|                               | $R_2$                 | MAE (eV) | $R_2$                                    | MAE (eV/atom) |
| ${}^1D_0$                     | 0.605                 | 0.259    | 0.765                                    | 0.312         |
| $D_0 + {}^2D_p$               | 0.822                 | 0.179    | 0.977                                    | 0.104         |
| $D_0 + {}^3M$                 | 0.812                 | 0.184    | 0.971                                    | 0.110         |
| $D_0 + M + {}^4D_A$           | 0.840                 | 0.110    | 0.991                                    | 0.061         |
| All ( $D_0 + D_p + M + D_A$ ) | 0.831                 | 0.130    | 0.987                                    | 0.070         |

<sup>1)</sup>  $D_0$ : Chemical descriptors      <sup>2)</sup>  $D_p$ : ionic radius (rA, rB, rArO, rBrO), tolerance factor (t)  
<sup>3)</sup> M: Mendeleev number for A and B  
<sup>4)</sup>  $D_A$ : atomic number, valence, electronegativity, group number, melting point, periodic number

Table S1. Prediction accuracy of machine learning model for band gap and formation energy depending on different combinations of descriptors.



| Rank | Importance | Feature                   |
|------|------------|---------------------------|
| 1    | 100.00     | MTA                       |
| 2    | 83.28      | AtNB                      |
| 3    | 71.93      | NegB                      |
| 4    | 65.27      | mean_CovalentRadius       |
| 5    | 53.52      | mean_MeltingT             |
| 6    | 51.80      | NegA                      |
| 7    | 50.26      | MB                        |
| 8    | 47.15      | maxdiff_GSvolume_pa       |
| 9    | 46.75      | MTB                       |
| 10   | 46.11      | mean_GSvolume_pa          |
| 11   | 45.41      | mean_NUnfilled            |
| 12   | 44.80      | MA                        |
| 13   | 44.34      | mean_Electronegativity    |
| 14   | 42.06      | ValB                      |
| 15   | 38.41      | maxdiff_MeltingT          |
| 16   | 38.13      | frac_dValence             |
| 17   | 35.50      | maxdiff_Electronegativity |
| 18   | 34.73      | maxdiff_CovalentRadius    |
| 19   | 33.68      | mean_MendeleevNumber      |
| 20   | 30.01      | dev_NUnfilled             |
| 21   | 29.98      | AtNA                      |
| 22   | 29.69      | mean_SpaceGroupNumber     |
| 23   | 26.53      | dev_GSvolume_pa           |
| 24   | 24.66      | frac_pValence             |
| 25   | 24.27      | dev_NValance              |
| 26   | 21.62      | maxdiff_Number            |
| 27   | 20.27      | MeanIonicChar             |
| 28   | 19.19      | maxdiff_MendeleevNumber   |
| 29   | 19.10      | dev_MeltingT              |
| 30   | 18.99      | mean_Number               |
| 31   | 18.67      | mean_Column               |
| 32   | 17.64      | frac_sValence             |
| 33   | 16.75      | CanFormIonic              |
| 34   | 16.10      | frac_fValence             |
| 35   | 15.30      | mean_NpUnfilled           |
| 36   | 14.57      | max_NUnfilled             |
| 37   | 14.45      | dev_MendeleevNumber       |
| 38   | 14.11      | mean_NfUnfilled           |
| 39   | 13.36      | maxdiff_SpaceGroupNumber  |
| 40   | 13.07      | mean_NdValance            |
| 41   | 13.06      | max_NValance              |
| 42   | 12.77      | min_MendeleevNumber       |
| 43   | 12.57      | mean_NdUnfilled           |
| 44   | 12.47      | mean_AtomicWeight         |
| 45   | 12.30      | ValA                      |
| 46   | 12.16      | maxdiff_NUnfilled         |
| 47   | 10.99      | dev_NdValance             |
| 48   | 10.52      | mean_NValance             |
| 49   | 10.40      | maxdiff_NValance          |
| 50   | 10.30      | mean_NsValance            |

| Rank | Importance | Feature                   |
|------|------------|---------------------------|
| 1    | 100.00     | mean_MeltingT             |
| 2    | 96.62      | MTB                       |
| 3    | 96.02      | AtNB                      |
| 4    | 87.94      | mean_GSvolume_pa          |
| 5    | 86.65      | mean_Electronegativity    |
| 6    | 85.55      | mean_CovalentRadius       |
| 7    | 81.95      | mean_SpaceGroupNumber     |
| 8    | 76.81      | MTA                       |
| 9    | 75.65      | mean_MendeleevNumber      |
| 10   | 72.56      | frac_dValence             |
| 11   | 69.38      | NegA                      |
| 12   | 68.32      | NegB                      |
| 13   | 67.53      | MB                        |
| 14   | 66.65      | MA                        |
| 15   | 62.77      | mean_NUnfilled            |
| 16   | 62.77      | AtNA                      |
| 17   | 55.81      | mean_Number               |
| 18   | 52.05      | dev_NValance              |
| 19   | 49.76      | MeanIonicChar             |
| 20   | 49.22      | frac_sValence             |
| 21   | 46.98      | maxdiff_MeltingT          |
| 22   | 46.95      | dev_GSvolume_pa           |
| 23   | 44.60      | dev_MeltingT              |
| 24   | 43.31      | dev_NUnfilled             |
| 25   | 40.53      | maxdiff_Number            |
| 26   | 40.08      | frac_pValence             |
| 27   | 37.75      | mean_AtomicWeight         |
| 28   | 36.63      | maxdiff_GSvolume_pa       |
| 29   | 36.47      | dev_MendeleevNumber       |
| 30   | 33.37      | CanFormIonic              |
| 31   | 33.18      | maxdiff_MendeleevNumber   |
| 32   | 31.34      | maxdiff_Electronegativity |
| 33   | 29.82      | maxdiff_CovalentRadius    |
| 34   | 29.13      | maxdiff_NValance          |
| 35   | 28.66      | dev_SpaceGroupNumber      |
| 36   | 28.20      | frac_fValence             |
| 37   | 27.67      | maxdiff_NUnfilled         |
| 38   | 27.65      | ValA                      |
| 39   | 25.67      | maxdiff_SpaceGroupNumber  |
| 40   | 25.35      | ValB                      |
| 41   | 24.88      | dev_Number                |
| 42   | 24.10      | mean_NValance             |
| 43   | 23.87      | mean_NdUnfilled           |
| 44   | 23.39      | dev_AtomicWeight          |
| 45   | 22.67      | mean_NpUnfilled           |
| 46   | 21.86      | mean_Column               |
| 47   | 18.61      | dev_Column                |
| 48   | 18.48      | mean_NdValance            |
| 49   | 15.04      | mean_NfUnfilled           |
| 50   | 12.19      | mean_GSbandgap            |

Table S2. List of 50 (descending order) most important features for prediction model of (a) band gap and (b) formation energy. Features other than standard chemical descriptors (145) are colored as red. Each descriptor is abbreviated as follows: melting point (MT), atomic number (AtN), electro-negativity (Neg), Mendeleev number (M), and valence (Val).

| Structure                | $E_{\text{Hull, T}}$<br>[eV/atom] | $E_{\text{Form, T}}$<br>[eV/atom] | $E_{\text{g, T}}$<br>[eV] | $E_{\text{Hull, C}}$<br>[eV/atom] | $E_{\text{Form, C}}$<br>[eV/atom] | $E_{\text{g, C}}$<br>[eV] | $\frac{ E_{\text{Form, T}^-} }{E_{\text{Form, C}}}$<br>[eV/atom] | $T_c$ [18]<br>[K] | $P_s$ [18]<br>[ $\mu\text{C}\cdot\text{cm}^{-2}$ ] |
|--------------------------|-----------------------------------|-----------------------------------|---------------------------|-----------------------------------|-----------------------------------|---------------------------|------------------------------------------------------------------|-------------------|----------------------------------------------------|
| <b>KNbO<sub>3</sub></b>  | -0.221                            | -2.697                            | 1.71                      | 0.011                             | -2.686                            | 1.74                      | 0.011                                                            | 708               | 30.0                                               |
| <b>BaTiO<sub>3</sub></b> | -0.030                            | -3.288                            | 1.68                      | 0.007                             | -3.281                            | 1.82                      | 0.007                                                            | 408               | 26.0                                               |
| <b>PbTiO<sub>3</sub></b> | -0.021                            | -2.517                            | 1.69                      | 0.024                             | -2.492                            | 1.48                      | 0.025                                                            | 765               | >50                                                |
| <b>LiNbO<sub>3</sub></b> | 0.071                             | -2.666                            | 2.05                      | 0.167                             | -2.570                            | 1.66                      | 0.096                                                            | 1480              | 71                                                 |
| <b>LiTaO<sub>3</sub></b> | 0.072                             | -2.895                            | 2.50                      | 0.140                             | -2.826                            | 2.70                      | 0.069                                                            | 938               | 50                                                 |

Table S3. List of widely known ferroelectric materials. The name of structures, Curie temperature ( $T_c$ ), and spontaneous polarization ( $P_s$ ) are obtained from previous reference [18].

| Category     | Conditions                                                                                                                                                                                                                                                                                                                                                                                                                                                        | Number     |
|--------------|-------------------------------------------------------------------------------------------------------------------------------------------------------------------------------------------------------------------------------------------------------------------------------------------------------------------------------------------------------------------------------------------------------------------------------------------------------------------|------------|
| 1            | <ul style="list-style-type: none"> <li>• <math>E_{\text{Form, T}} &lt; E_{\text{Form, C}}</math></li> <li>• <math> E_{\text{Form, T}} - E_{\text{Form, C}}  &lt; 100 \text{ meV/atom}</math></li> <li>• <math>E_{\text{g, C}} &gt; 1.0 \text{ eV}</math></li> </ul>                                                                                                                                                                                               | 63         |
| 2            | <ul style="list-style-type: none"> <li>• <math>E_{\text{Form, T}} &lt; E_{\text{Form, C}}</math></li> <li>• <math> E_{\text{Form, T}} - E_{\text{Form, C}}  &lt; 100 \text{ meV/atom}</math></li> <li>• <math>0.2 \text{ eV} &lt; E_{\text{g, C}} &lt; 1.0 \text{ eV}</math></li> </ul>                                                                                                                                                                           | 16         |
| 3            | <ul style="list-style-type: none"> <li>• <math>E_{\text{Form, T}} &gt; E_{\text{Form, C}}</math></li> <li>• <math> E_{\text{Form, T}} - E_{\text{Form, C}}  &lt; 100 \text{ meV/atom}</math></li> <li>• <math>E_{\text{g, C}} &gt; 0.2 \text{ eV}</math></li> </ul>                                                                                                                                                                                               | 65         |
| 4            | <ul style="list-style-type: none"> <li>• <math>E_{\text{Form, T}} &gt; E_{\text{Form, C}}</math></li> <li>• <math> E_{\text{Form, T}} - E_{\text{Form, C}}  &gt; 100 \text{ meV/atom}</math></li> <li>• <math>E_{\text{g, C}} &gt; 0.2 \text{ eV}</math></li> </ul>                                                                                                                                                                                               | 70         |
| 5            | <ul style="list-style-type: none"> <li>• Not available for tetragonal phase<br/>(RbPaO<sub>3</sub>, BaHfO<sub>3</sub>, TiPaO<sub>3</sub>, LiPaO<sub>3</sub>,<br/>CeGaO<sub>3</sub>, GaPaO<sub>3</sub>, NpScO<sub>3</sub>, NpGaO<sub>3</sub>,<br/>NdScO<sub>3</sub>, SmScO<sub>3</sub>, InPaO<sub>3</sub>, NpAlO<sub>3</sub>,<br/>NpInO<sub>3</sub>, NdInO<sub>3</sub>, BaPaO<sub>3</sub>, NpCrO<sub>3</sub>,<br/>CuTaO<sub>3</sub>, CuPaO<sub>3</sub>)</li> </ul> | 18         |
| <b>Total</b> |                                                                                                                                                                                                                                                                                                                                                                                                                                                                   | <b>232</b> |

Table S4. Number of structures satisfying each condition. Categories 1 and 2 are the target conditions in this study.

Table S5. List (232) of cubic phase satisfying the target conditions ( $E_{g,C} > 0$  eV,  $E_{Hull,C} < 0.5$  eV/atom). The name of tab in excel file is ‘Cubic\_232’

Table S6. List (63) of structures satisfying the target conditions ( $E_{g,C} > 1$  eV,  $E_{Hull,C} < 0.5$  eV/atom,  $E_{Form,T} < E_{Form,C}$  whose energy difference is  $< 100$  meV/atom). The name of tab in excel file is ‘T-C-Satisfied’

Table S7. List of those partially satisfying target conditions. The name of tab in excel file is ‘T-C-Unsatisfied’. Condition in red means that the structure does not qualify.

| Chemical Formula   | Stable Phase |
|--------------------|--------------|
| RbPaO <sub>3</sub> | Orthorhombic |
| BaHfO <sub>3</sub> | Cubic        |
| TlPaO <sub>3</sub> | Cubic        |
| LiPaO <sub>3</sub> | Rhombohedral |
| CeGaO <sub>3</sub> | Orthorhombic |
| GaPaO <sub>3</sub> | Orthorhombic |
| NpScO <sub>3</sub> | Orthorhombic |
| NpGaO <sub>3</sub> | Orthorhombic |
| NdScO <sub>3</sub> | Orthorhombic |
| SmScO <sub>3</sub> | Orthorhombic |
| InPaO <sub>3</sub> | Cubic        |
| NpAlO <sub>3</sub> | Rhombohedral |
| NpInO <sub>3</sub> | Orthorhombic |
| NdInO <sub>3</sub> | Orthorhombic |
| BaPaO <sub>3</sub> | Orthorhombic |
| NpCrO <sub>3</sub> | Orthorhombic |
| CuTaO <sub>3</sub> | Orthorhombic |
| CuPaO <sub>3</sub> | Rhombohedral |

Table S8. Materials whose properties are not available at tetragonal phase but available at their most stable phase from OQMD database.
