# Supplementary material for: Accelerated discovery of potential ferroelectric perovskiteviaactive learning
Source: Royal Society of Chemistry journal article supplement (doi:10.1039/d0tc00985g), 2020-01-01
Supplement: d0tc00985g2.xlsx [file d0tc00985g2.xlsx]

## Sheet: Cubic_232
	ABO3 Cubic
	Eg > 0 eV
	EHull < 0.5 eV/atom				[eV/atom]	[eV/atom]	[eV]
			Index	Structure	EHull	FormE	Bandgap	AddedWhen
			1	BaSnO3	-0.0515295	-2.44259	0.883	0
			2	BaThO3	0.101207	-3.51904	3.273	0
			3	CeFeO3	0.0988629	-2.57008	0.336	0
			4	CeHoO3	0.490989	-3.20627	1.935	0
			5	CeTmO3	0.422151	-3.30396	1.929	0
			6	CuVO3	0.332791	-1.51543	0.238	0
			7	EuGeO3	0.0109192	-2.69263	1.163	0
			8	EuPaO3	0.340987	-2.99987	0.34	0
			9	GdScO3	0.435204	-3.3648	2.589	0
			10	GeTiO3	0.326532	-2.18571	1.974	0
			11	HoGaO3	0.325507	-2.67254	3.186	0
			12	LaGaO3	0.0631392	-2.87155	3.561	0
			13	LaInO3	0.322831	-2.45546	2.2	0
			14	LiNbO3	0.167179	-2.57025	1.662	0
			15	LuAlO3	0.234125	-3.38766	3.181	0
			16	MnSnO3	0.485001	-1.54132	0.725	0
			17	NaUO3	0.0564905	-3.05104	3.151	0
			18	PbHfO3	0.0319778	-2.80009	2.572	0
			19	PmCrO3	0.17612	-2.96654	1.664	0
			20	RbPaO3	0.000264115	-2.92685	3.979	0
			21	SmGaO3	0.175289	-2.75198	3.064	0
			22	TbFeO3	0.307388	-2.3362	0.265	0
			23	UCrO3	0.26058	-2.85824	1.074	0
			24	AcScO3	0.0910297	-3.67103	3.79	1
			25	CeAlO3	0.00932161	-3.4697	3.141	1
			26	CsPaO3	0.000260262	-2.8709	3.815	1
			27	CsUO3	0.0100147	-3.04483	2.652	1
			28	DyAlO3	0.128487	-3.45916	3.099	1
			29	ErAlO3	0.167688	-3.43478	3.197	1
			30	GdAlO3	0.0908432	-3.47861	3.036	1
			31	HoAlO3	0.147981	-3.4469	3.167	1
			32	LaAlO3	0.00687155	-3.55429	3.601	1
			33	NdAlO3	0.0277172	-3.48487	2.932	1
			34	PmAlO3	0.041196	-3.48933	3.135	1
			35	PrAlO3	0.0186533	-3.48092	3.034	1
			36	RbUO3	0.000460676	-3.11352	3.002	1
			37	SmAlO3	0.0532772	-3.48362	3.026	1
			38	SrPaO3	0.210712	-2.96973	0.672	1
			39	SrThO3	0.330101	-3.39029	2.27	1
			40	TbAlO3	0.109428	-3.33853	3.057	1
			41	TmAlO3	0.193299	-3.42235	3.107	1
			42	BaPaO3	0.068917	-3.0836	1.847	2
			43	DyGaO3	0.297011	-2.69192	3.133	2
			44	ErGaO3	0.35178	-2.65456	3.099	2
			45	GeHfO3	0.455251	-2.42241	1.638	2
			46	KPaO3	-0.567112	-2.9469	4.236	2
			47	LaScO3	0.203778	-3.58512	2.876	2
			48	NpAlO3	0.000458193	-3.50197	2.27	2
			49	PbThO3	0.445443	-2.62528	0.969	2
			50	PbTiO3	0.0242377	-2.4924	1.477	2
			51	PbZrO3	0.0731093	-2.63525	2.548	2
			52	SnHfO3	0.213045	-2.70528	1.946	2
			53	SnTiO3	0.151171	-2.41489	1.07	2
			54	TbGaO3	0.268929	-2.5787	3.082	2
			55	TbScO3	0.47332	-3.21051	2.554	2
			56	TmGaO3	0.382247	-2.6341	3.153	2
			57	YScO3	0.494738	-3.31305	2.675	2
			58	AcGaO3	0.00985187	-2.90382	3.356	3
			59	CeGaO3	0.0652797	-2.78785	3.165	3
			60	CsNbO3	0.245114	-2.43067	1.409	3
			61	EuSiO3	0.109387	-3.28291	3.989	3
			62	GaPaO3	0.13349	-2.42607	3.027	3
			63	LiPaO3	0.24421	-2.71869	3.3	3
			64	LiUO3	0.221744	-2.9246	3.241	3
			65	LuGaO3	0.441671	-2.58957	3.12	3
			66	NaPaO3	0.0665101	-2.8488	3.432	3
			67	NdCrO3	0.144796	-2.97693	1.632	3
			68	PrCrO3	0.116563	-2.98745	1.753	3
			69	RbNbO3	0.0741058	-2.59966	1.599	3
			70	RbVO3	0.35956	-2.00895	0.265	3
			71	ThMgO3	0.419689	-3.30097	2.241	3
			72	YbSiO3	0.103554	-3.27407	4.651	3
			73	GaUO3	0.375445	-2.61642	2.994	4
			74	InPaO3	-0.00758736	-2.48155	2.563	4
			75	InUO3	0.241185	-2.66508	1.969	4
			76	NpGaO3	0.12662	-2.79991	2.625	4
			77	NpInO3	0.487703	-2.35323	2.045	4
			78	PuGaO3	0.307083	-2.58806	2.203	4
			79	TlPaO3	-0.358353	-2.56301	3.399	4
			80	TlUO3	-0.10831	-2.74528	2.695	4
			81	AcAlO3	-0.109709	-3.53212	4.307	5
			82	AcInO3	0.178637	-2.56971	2.569	5
			83	BaTiO3	0.00650794	-3.28104	1.819	5
			84	BaZrO3	-0.0956393	-3.47696	3.108	5
			85	CaSiO3	0.237772	-3.05433	4.021	5
			86	EuThO3	0.496203	-3.40454	2.113	5
			87	KTaO3	4.7886e-05	-2.92037	2.192	5
			88	SnZrO3	0.260614	-2.53401	1.912	5
			89	SrSiO3	0.320899	-2.95579	2.993	5
			90	SrZrO3	0.0541864	-3.44735	3.342	5
			91	AcSmO3	0.480446	-3.15995	2.345	6
			92	CaGeO3	0.0714671	-2.4278	0.962	6
			93	CeInO3	0.328669	-2.3577	1.83	6
			94	CeScO3	0.206335	-3.4951	2.579	6
			95	CsTaO3	0.216822	-2.62812	2.093	6
			96	LuCoO3	0.38684	-2.22075	0.905	6
			97	NaTaO3	0.0131588	-2.91836	2.375	6
			98	PrGaO3	0.0915374	-2.78331	3.152	6
			99	RbTaO3	0.0518365	-2.82048	2.238	6
			100	SrGeO3	0.143216	-2.43436	0.308	6
			101	ThBeO3	0.381132	-3.3475	2.753	6
			102	YbGeO3	0.0787012	-2.60947	1.54	6
			103	AcDyO3	0.323961	-3.39094	2.721	7
			104	AcTbO3	0.356567	-3.21345	2.559	7
			105	CaTiO3	0.0721713	-3.29511	1.877	7
			106	CaZrO3	0.196035	-3.32101	3.46	7
			107	EuHfO3	0.0979847	-3.74629	3.839	7
			108	EuZrO3	0.135031	-3.5558	3.497	7
			109	MgSiO3	0.470234	-2.6069	2.722	7
			110	NaNbO3	0.0369715	-2.66859	1.748	7
			111	ScAlO3	0.430076	-3.10615	1.612	7
			112	CeCrO3	0.0888172	-2.99337	1.752	8
			113	EuTiO3	0.0229794	-3.53513	1.947	8
			114	LiVO3	0.212177	-2.16059	0.425	8
			115	MgTiO3	0.487537	-2.70066	1.692	8
			116	NdScO3	0.283315	-3.45263	2.574	8
			117	PmScO3	0.32283	-3.43135	2.791	8
			118	PrScO3	0.246479	-3.47459	2.583	8
			119	SmScO3	0.350402	-3.40998	2.57	8
			120	YbZrO3	0.255219	-3.40542	3.729	8
			121	BaHfO3	-0.247148	-3.62496	3.687	9
			122	CaHfO3	0.158591	-3.5104	3.911	9
			123	SrHfO3	0.032587	-3.6204	4	9
			124	TlTaO3	0.035771	-2.42051	0.681	9
			125	YbHfO3	0.210499	-3.60504	3.696	9
			126	YbTiO3	0.102809	-3.42556	1.963	9
			127	AcCrO3	0.018947	-3.11895	1.666	10
			128	AcErO3	0.274683	-3.47307	2.879	10
			129	AcLuO3	0.207129	-3.58582	3.213	10
			130	AcYO3	0.326158	-3.36782	2.783	10
			131	BiScO3	0.346609	-2.2941	1.049	10
			132	LaLuO3	0.371913	-3.46517	2.421	10
			133	NaVO3	0.254138	-2.22084	0.387	10
			134	NdLuO3	0.476491	-3.31454	2.148	10
			135	PrLuO3	0.424441	-3.34441	2.054	10
			136	SrSnO3	0.0472212	-2.44793	1.56	10
			137	SrTiO3	0.000908594	-3.35266	1.88	10
			138	YbSnO3	0.233187	-2.45256	2.257	10
			139	AcFeO3	0.0234051	-2.70749	0.454	11
			140	CeLuO3	0.365849	-3.37516	2.157	11
			141	EuSnO3	0.111154	-2.59009	2.052	11
			142	LaCrO3	0.0854498	-3.08264	1.8	11
			143	LiTaO3	0.140215	-2.82594	2.702	11
			144	NpCrO3	0.0814382	-3.00127	1.692	11
			145	PmCoO3	0.134372	-2.34443	0.822	11
			146	SmCoO3	0.157941	-2.3288	0.847	11
			147	TmCoO3	0.333501	-2.25919	0.783	11
			148	YCrO3	0.304049	-2.87405	1.69	11
			149	AcGdO3	0.392118	-3.29408	2.4	12
			150	CdSiO3	0.369292	-2.01039	0.856	12
			151	GaNbO3	0.183387	-2.16176	0.313	12
			152	GdCrO3	0.261903	-2.92336	1.758	12
			153	NpFeO3	0.260618	-2.57361	0.373	12
			154	SmCrO3	0.199265	-2.95168	1.721	12
			155	YCoO3	0.250549	-2.28032	0.934	12
			156	GdGaO3	0.27207	-2.72645	2.897	13
			157	PuBeO3	0.232174	-2.91081	1.052	13
			158	YAlO3	0.123165	-3.43653	2.952	13
			159	CaSnO3	0.199571	-2.34629	1.814	14
			160	DyCrO3	0.315965	-2.88757	1.758	14
			161	HoCrO3	0.342626	-2.8679	1.798	14
			162	LuCrO3	0.451237	-2.7816	1.752	14
			163	TbCrO3	0.289313	-2.77481	1.616	14
			164	NdInO3	0.425099	-2.30714	1.876	15
			165	PrFeO3	0.129369	-2.56083	0.36	15
			166	SnPuO3	0.428532	-2.28138	0.942	15
			167	BaPuO3	0.031355	-3.26903	2.138	16
			168	CdGeO3	0.296562	-1.40473	0.271	16
			169	GaTaO3	0.145671	-2.39564	1.007	16
			170	KVO3	0.218248	-2.15157	0.29	16
			171	TmCrO3	0.402298	-2.82676	1.736	16
			172	CaPuO3	0.336156	-3.0073	2.071	17
			173	EuPuO3	0.273406	-3.22827	2.198	17
			174	GeSiO3	0.476433	-1.93436	2.551	17
			175	MnGeO3	0.358454	-1.66709	1.274	17
			176	MnSiO3	0.364056	-2.3502	2.301	17
			177	PbSiO3	0.391445	-2.01105	1.579	17
			178	SnSiO3	0.476638	-1.98233	1.119	17
			179	SrPuO3	0.156093	-3.17349	2.128	17
			180	YbPuO3	0.415642	-3.0538	1.531	17
			181	GeGeO3	0.375439	-1.32453	1.215	18
			182	PbPuO3	0.156834	-2.38322	1.152	18
			183	KNbO3	0.010495	-2.68639	1.735	19
			184	PbSnO3	0.094895	-1.61861	1.502	19
			185	SbAlO3	0.312537	-2.10981	1.423	19
			186	BiAlO3	0.122458	-2.26583	1.685	20
			187	BiGaO3	0.222333	-1.57611	1.464	20
			188	SbGaO3	0.448379	-1.39186	1.211	20
			189	SnSnO3	0.262058	-1.52486	1.401	20
			190	YGaO3	0.292127	-2.67737	3.013	21
			191	CeCoO3	0.0974833	-2.32528	0.531	22
			192	LaCoO3	0.085763	-2.41964	0.524	22
			193	LaErO3	0.462954	-3.34164	2.001	22
			194	LaTmO3	0.426547	-3.39564	2.127	22
			195	PmGaO3	0.146321	-2.76572	2.976	22
			196	ErCrO3	0.368803	-2.84828	1.806	23
			197	NpErO3	0.468922	-3.22963	2.108	24
			198	NpHoO3	0.492586	-3.18489	1.921	24
			199	NpLuO3	0.391492	-3.35726	2.51	24
			200	NpScO3	0.218836	-3.49409	2.777	24
			201	NpTmO3	0.437739	-3.28614	2.321	24
			202	AcCoO3	0.0080667	-2.41831	0.454	25
			203	PmInO3	0.488057	-2.27229	1.748	26
			204	PmFeO3	0.193035	-2.53362	0.384	27
			205	AcTmO3	0.249102	-3.5227	2.887	28
			206	CdTiO3	0.201914	-2.27932	0.22	28
			207	PrInO3	0.371865	-2.33819	1.812	28
			208	PrTmO3	0.48311	-3.27085	1.833	28
			209	DyCoO3	0.249808	-2.30198	0.757	29
			210	ErCoO3	0.301632	-2.27346	0.77	29
			211	HoCoO3	0.275199	-2.28864	0.785	29
			212	CuUO3	0.333939	-2.28624	1.051	30
			213	AcHoO3	0.297148	-3.43351	2.72	31
			214	AgNbO3	0.0627337	-1.99225	1.437	31
			215	AgPaO3	0.113707	-2.21268	1.014	31
			216	AgTaO3	0.0269461	-2.23808	1.877	33
			217	AgUO3	0.100928	-2.41257	1.402	33
			218	BiCrO3	0.187823	-1.79006	0.36	34
			219	CeErO3	0.458919	-3.24959	1.898	36
			220	CuNbO3	0.267998	-1.92218	1.569	37
			221	CuPaO3	0.343798	-2.08119	0.847	38
			222	CuTaO3	0.21912	-2.17737	1.678	39
			223	GdFeO3	0.277989	-2.48784	0.236	39
			224	LaHoO3	0.494956	-3.29838	1.977	39
			225	MnHfO3	0.420629	-2.69787	0.576	Notadded
			226	MnTiO3	0.333692	-2.50379	1.204	Notadded
			227	MnZrO3	0.496856	-2.49794	0.411	Notadded
			228	NdGaO3	0.118359	-2.77372	2.879	Notadded
			229	PrCoO3	0.0711041	-2.3443	0.77	Notadded
			230	TbCoO3	0.223169	-2.18374	0.75	Notadded
			231	ThNiO3	0.401577	-2.63718	0.344	Notadded
			232	BiCoO3	0.258276	-1.12721	0.405	Notadded

## Sheet: T-C-Satisfied
	EForm, T < EForm, C
	Difference	<100 meV/atom
	Eg	>1 eV
					[eV/atom]	[eV/atom]	[eV]	[eV/atom]	[eV/atom]	[eV]	[eV/atom]
			Index	Structure	EHull, T	EForm, T	Eg, T	EHull, C	EForm, C	Eg, C	Difference
			1	GaTaO3	0.1455	-2.3958	0.99	0.1457	-2.3956	1.01	0.134
			2	TbAlO3	0.1084	-3.3395	3.32	0.1094	-3.3385	3.06	1.016
			3	MnSiO3	0.363	-2.3513	2.02	0.3641	-2.3502	2.3	1.073
			4	EuTiO3	0.0214	-3.5367	1.91	0.023	-3.5351	1.95	1.584
			5	SrZrO3	0.052	-3.4495	3.5	0.0542	-3.4473	3.34	2.145
			6	PrGaO3	0.0888	-2.7861	3.31	0.0915	-2.7833	3.15	2.741
			7	PuBeO3	0.2294	-2.9136	0.84	0.2322	-2.9108	1.05	2.742
			8	NaUO3	0.0532	-3.0543	3.33	0.0565	-3.051	3.15	3.246
			9	EuSnO3	0.1079	-2.5934	2.05	0.1112	-2.5901	2.05	3.288
			10	AgNbO3	0.0593	-1.9957	1.59	0.0627	-1.9923	1.44	3.417
			11	RbTaO3	0.0482	-2.8241	2.23	0.0518	-2.8205	2.24	3.608
			12	PrCrO3	0.1128	-2.9912	1.92	0.1166	-2.9874	1.75	3.743
			13	DyAlO3	0.1241	-3.4635	3.63	0.1285	-3.4592	3.1	4.352
			14	GaUO3	0.3691	-2.6228	2.49	0.3754	-2.6164	2.99	6.377
			15	NaNbO3	0.0306	-2.675	1.76	0.037	-2.6686	1.75	6.408
			16	BaTiO3	-0.0299	-3.2875	1.68	0.0065	-3.281	1.82	6.508
			17	AgUO3	0.0941	-2.4194	1.4	0.1009	-2.4126	1.4	6.801
			18	NdGaO3	0.1102	-2.7818	3.77	0.1184	-2.7737	2.88	8.12
			19	HoAlO3	0.139	-3.4558	4.08	0.148	-3.4469	3.17	8.936
			20	CaTiO3	0.0625	-3.3048	2.15	0.0722	-3.2951	1.88	9.707
			21	KNbO3	-0.2208	-2.6969	1.71	0.0105	-2.6864	1.74	10.495
			22	RbNbO3	0.0618	-2.612	1.59	0.0741	-2.5997	1.6	12.35
			23	TmAlO3	0.1808	-3.4349	3.94	0.1933	-3.4224	3.11	12.519
			24	LuAlO3	0.2186	-3.4032	0.46	0.2341	-3.3877	3.18	15.492
			25	SmGaO3	0.1598	-2.7675	4.02	0.1753	-2.752	3.06	15.497
			26	EuHfO3	0.0805	-3.7638	3.92	0.098	-3.7463	3.84	17.526
			27	PbSnO3	0.075	-1.6385	1.4	0.0949	-1.6186	1.5	19.931
			28	PbHfO3	0.0095	-2.8226	2.49	0.032	-2.8001	2.57	22.511
			29	BaThO3	0.0781	-3.5421	3.22	0.1012	-3.519	3.27	23.082
			30	PbTiO3	-0.0212	-2.5166	1.69	0.0242	-2.4924	1.48	24.238
			31	CaSnO3	0.1752	-2.3707	1.82	0.1996	-2.3463	1.81	24.389
			32	ErAlO3	0.1423	-3.4602	4.29	0.1677	-3.4348	3.2	25.405
			33	SrPuO3	0.124	-3.2055	2.13	0.1561	-3.1735	2.13	32.046
			34	SrSiO3	0.2872	-2.9895	2.15	0.3209	-2.9558	2.99	33.686
			35	GdCrO3	0.2264	-2.9588	2.07	0.2619	-2.9234	1.76	35.459
			36	AcInO3	0.141	-2.6074	2.62	0.1786	-2.5697	2.57	37.674
			37	PbZrO3	0.0338	-2.6746	2.51	0.0731	-2.6353	2.55	39.344
			38	CaHfO3	0.1168	-3.5521	3.98	0.1586	-3.5104	3.91	41.749
			39	EuZrO3	0.0918	-3.599	3.43	0.135	-3.5558	3.5	43.236
			40	TbCrO3	0.2448	-2.8193	2.04	0.2893	-2.7748	1.62	44.467
			41	PmGaO3	0.0985	-2.8136	3.54	0.1463	-2.7657	2.98	47.867
			42	CeScO3	0.1477	-3.5537	3.7	0.2063	-3.4951	2.58	58.61
			43	DyCrO3	0.2548	-2.9488	1.95	0.316	-2.8876	1.76	61.184
			44	LaScO3	0.1404	-3.6485	3.68	0.2038	-3.5851	2.88	63.392
			45	SnHfO3	0.1471	-2.7713	1.6	0.213	-2.7053	1.95	65.983
			46	SnSnO3	0.1939	-1.5931	0.86	0.2621	-1.5249	1.4	68.191
			47	LiTaO3	0.0715	-2.8946	2.5	0.1402	-2.8259	2.7	68.676
			48	HoCrO3	0.2717	-2.9388	2.04	0.3426	-2.8679	1.8	70.93
			49	SnTiO3	0.0782	-2.4878	0.74	0.1512	-2.4149	1.07	72.938
			50	CaZrO3	0.123	-3.3941	3.61	0.196	-3.321	3.46	73.061
			51	AcLuO3	0.1312	-3.6618	3.54	0.2071	-3.5858	3.21	75.964
			52	GdGaO3	0.1936	-2.8049	3.77	0.2721	-2.7264	2.9	78.462
			53	ErCrO3	0.2864	-2.9306	2.1	0.3688	-2.8483	1.81	82.362
			54	ThMgO3	0.3353	-3.3853	3.41	0.4197	-3.301	2.24	84.35
			55	PrScO3	0.1609	-3.5601	3.82	0.2465	-3.4746	2.58	85.538
			56	CuNbO3	0.1822	-2.008	0.47	0.268	-1.9222	1.57	85.779
			57	PbPuO3	0.0663	-2.4737	1.35	0.1568	-2.3832	1.15	90.51
			58	SnZrO3	0.1673	-2.6273	1.66	0.2606	-2.534	1.91	93.303
			59	EuPuO3	0.1792	-3.3225	2.2	0.2734	-3.2283	2.2	94.227
			60	GeSiO3	0.3818	-2.029	2.06	0.4764	-1.9344	2.55	94.621
			61	TbGaO3	0.1742	-2.6734	3.79	0.2689	-2.5787	3.08	94.744
			62	LiNbO3	0.0712	-2.6662	2.05	0.1672	-2.5703	1.66	95.961
			63	TmCrO3	0.3052	-2.9239	2.05	0.4023	-2.8268	1.74	97.141

## Sheet: T-C-Unsatisfied
	EForm, T < EForm, C													EForm, T < EForm, C
	Difference	<100 meV/atom												Difference	>100 meV/atom
	Eg	>0 eV and <1 eV												Eg	>0 eV
					[eV/atom]	[eV/atom]	[eV]	[eV/atom]	[eV/atom]	[eV]	[eV/atom]							[eV/atom]	[eV/atom]	[eV]	[eV/atom]	[eV/atom]	[eV]	[eV/atom]
			Index	Structure	EHull, T	EForm, T	Eg, T	EHull, C	EForm, C	Eg, C	Difference					Index	Structure	EHull, T	EForm, T	Eg, T	EHull, C	EForm, C	Eg, C	Difference
			1	CdSiO3	0.28578	-2.0939	0	0.369292	-2.01039	0.856	0.0835121					1	SrThO3	0.22756	-3.49284	2.264	0.330101	-3.39029	2.27	0.102541
			2	SmCoO3	0.148812	-2.33793	0.771	0.157941	-2.3288	0.847	0.0091282					2	GdFeO3	0.172017	-2.59381	0.939	0.277989	-2.48784	0.236	0.105972
			3	HoCoO3	0.252202	-2.31164	0	0.275199	-2.28864	0.785	0.0229975					3	AcTmO3	0.140746	-3.63106	3.381	0.249102	-3.5227	2.887	0.108357
			4	DyCoO3	0.229901	-2.32189	0.751	0.249808	-2.30198	0.757	0.0199071					4	LiUO3	0.10777	-3.03858	3.158	0.221744	-2.9246	3.241	0.113974
			5	TbCoO3	0.207907	-2.199	0.87	0.223169	-2.18374	0.75	0.0152622					5	SnSiO3	0.36223	-2.09673	0.865	0.476638	-1.98233	1.119	0.114407
			6	TlTaO3	0.0343428	-2.42193	0.836	0.035771	-2.42051	0.681	0.00142819					6	PbSiO3	0.276084	-2.12641	1.837	0.391445	-2.01105	1.579	0.115361
			7	SrPaO3	0.141609	-3.03883	0.844	0.210712	-2.96973	0.672	0.0691023					7	TbFeO3	0.19057	-2.45302	0.908	0.307388	-2.3362	0.265	0.116818
			8	CeCoO3	0.0864531	-2.33631	0.617	0.0974833	-2.32528	0.531	0.0110302					8	LuCrO3	0.333458	-2.89938	2.209	0.451237	-2.7816	1.752	0.11778
			9	BiCoO3	0.188852	-1.19663	0.558	0.258276	-1.12721	0.405	0.0694235					9	KVO3	0.0989439	-2.27088	0.284	0.218248	-2.15157	0.29	0.119304
			10	NaVO3	0.213817	-2.26116	0.38	0.254138	-2.22084	0.387	0.0403205					10	CaPuO3	0.216076	-3.12738	2.083	0.336156	-3.0073	2.071	0.12008
			11	PrFeO3	0.117257	-2.57294	0.539	0.129369	-2.56083	0.36	0.0121114					11	MgSiO3	0.347501	-2.72963	2.561	0.470234	-2.6069	2.722	0.122733
			12	BiCrO3	0.103831	-1.87405	0.585	0.187823	-1.79006	0.36	0.0839915					12	MnTiO3	0.208793	-2.62869	1.491	0.333692	-2.50379	1.204	0.124899
			13	ThNiO3	0.368261	-2.67049	1.206	0.401577	-2.63718	0.344	0.0333159					13	AcErO3	0.145126	-3.60263	3.104	0.274683	-3.47307	2.879	0.129557
			14	GaNbO3	0.158882	-2.18626	0.296	0.183387	-2.16176	0.313	0.0245045					14	MnGeO3	0.227752	-1.79779	0.926	0.358454	-1.66709	1.274	0.130702
			15	CuVO3	0.248984	-1.59924	0	0.332791	-1.51543	0.238	0.0838065					15	YbTiO3	0.251058	-3.55673	3.461	0.102809	-3.42556	1.963	0.131172
			16	CdTiO3	0.164225	-2.317	0.42	0.201914	-2.27932	0.22	0.0376889					16	LiVO3	0.0735992	-2.29917	0.815	0.212177	-2.16059	0.425	0.138578
																17	SnPuO3	0.289905	-2.42001	1.332	0.428532	-2.28138	0.942	0.138627
																18	DyGaO3	0.153918	-2.83501	3.224	0.297011	-2.69192	3.133	0.143092
																19	EuPaO3	0.195291	-3.14557	0.685	0.340987	-2.99987	0.34	0.145696
																20	LaInO3	0.176208	-2.60209	2.651	0.322831	-2.45546	2.2	0.146623
																21	GeGeO3	0.228401	-1.47157	0.237	0.375439	-1.32453	1.215	0.147038
	EForm, T > EForm, C															22	PmScO3	0.171506	-3.58267	4.013	0.32283	-3.43135	2.791	0.151324
	Difference	<100 meV/atom														23	PbThO3	0.292472	-2.77825	1.13	0.445443	-2.62528	0.969	0.15297
	Eg	>0 eV														24	AcHoO3	0.143099	-3.58756	3.058	0.297148	-3.43351	2.72	0.15405
					[eV/atom]	[eV/atom]	[eV]	[eV/atom]	[eV/atom]	[eV]	[eV/atom]					25	MnSnO3	0.325567	-1.70076	0.851	0.485001	-1.54132	0.725	0.159434
			Index	Structure	EHull, T	EForm, T	Eg, T	EHull, C	EForm, C	Eg, C	Difference					26	HoGaO3	0.163124	-2.83492	3.265	0.325507	-2.67254	3.186	0.162383
			1	YbSiO3	0.549029	-1.94193	0	0.103554	-3.27407	4.651	1.33215					27	CeInO3	0.166268	-2.5201	2.499	0.328669	-2.3577	1.83	0.162401
			2	AcAlO3	0.00394744	-3.52818	4.209	-0.109709	-3.53212	4.307	0.00394744					28	GeHfO3	0.287898	-2.58977	1.584	0.455251	-2.42241	1.638	0.167353
			3	KPaO3	0.00337345	-2.94352	4.166	-0.567112	-2.9469	4.236	0.00337345					29	CsTaO3	0.0487881	-2.79615	2.565	0.216822	-2.62812	2.093	0.168034
			4	CaSiO3	0.239586	-3.05252	4.033	0.237772	-3.05433	4.021	0.00181448					30	CsNbO3	0.0752732	-2.60051	1.792	0.245114	-2.43067	1.409	0.169841
			5	SrHfO3	0.035195	-3.61779	4.001	0.032587	-3.6204	4	0.002608					31	NpLuO3	0.221213	-3.52754	1.894	0.391492	-3.35726	2.51	0.17028
			6	EuSiO3	0.109813	-3.28249	3.864	0.109387	-3.28291	3.989	0.000425878					32	SbAlO3	0.140563	-2.28179	1.287	0.312537	-2.10981	1.423	0.171974
			7	CsPaO3	0.000862886	-2.8703	3.837	0.000260262	-2.8709	3.815	0.000602624					33	MnHfO3	0.247486	-2.87101	1.465	0.420629	-2.69787	0.576	0.173144
			8	AcScO3	0.0927116	-3.66935	3.6	0.0910297	-3.67103	3.79	0.00168194					34	GeTiO3	0.151106	-2.36114	1.509	0.326532	-2.18571	1.974	0.175426
			9	YbZrO3	0.356693	-2.20697	0	0.255219	-3.40542	3.729	1.19845					35	CeLuO3	0.187172	-3.55383	3.402	0.365849	-3.37516	2.157	0.178677
			10	YbHfO3	0.238	-3.06906	0	0.210499	-3.60504	3.696	0.535976					36	ErGaO3	0.173069	-2.83327	3.179	0.35178	-2.65456	3.099	0.178711
			11	LaAlO3	0.015072	-3.54609	3.332	0.00687155	-3.55429	3.601	0.00820041					37	ScAlO3	0.250134	-3.28609	4.015	0.430076	-3.10615	1.612	0.179942
			12	LaGaO3	0.0667174	-2.86797	3.544	0.0631392	-2.87155	3.561	0.00357817					38	LaLuO3	0.189586	-3.6475	3.579	0.371913	-3.46517	2.421	0.182328
			13	NaPaO3	322.545	319.63	0	0.0665101	-2.8488	3.432	322.479					39	BiGaO3	0.0395866	-1.75886	2.053	0.222333	-1.57611	1.464	0.182746
			14	AcGaO3	0.0124243	-2.90125	3.327	0.00985187	-2.90382	3.356	0.00257247					40	AcDyO3	0.135993	-3.57891	3.077	0.323961	-3.39094	2.721	0.187969
			15	CeAlO3	0.0114292	-3.46759	2.971	0.00932161	-3.4697	3.141	0.00210755					41	PrInO3	0.18335	-2.52671	2.536	0.371865	-2.33819	1.812	0.188515
			16	PmAlO3	0.0427916	-3.48773	2.939	0.041196	-3.48933	3.135	0.00159561					42	EuThO3	0.304365	-3.59638	2.136	0.496203	-3.40454	2.113	0.191838
			17	BaZrO3	0.000344866	-3.47661	3.318	-0.0956393	-3.47696	3.108	0.000344866					43	TmGaO3	0.180223	-2.83612	3.089	0.382247	-2.6341	3.153	0.202023
			18	GdAlO3	0.0935441	-3.47591	3.16	0.0908432	-3.47861	3.036	0.00270088					44	PuGaO3	0.0993081	-2.79584	2.412	0.307083	-2.58806	2.203	0.207775
			19	PrAlO3	0.0199452	-3.47963	3.032	0.0186533	-3.48092	3.034	0.00129183					45	PrLuO3	0.214842	-3.55401	3.085	0.424441	-3.34441	2.054	0.209599
			20	SmAlO3	0.0563815	-3.48052	3.029	0.0532772	-3.48362	3.026	0.00310434					46	NpTmO3	0.223923	-3.49995	1.719	0.437739	-3.28614	2.321	0.213816
			21	YGaO3	0.197951	-2.02264	0	0.292127	-2.67737	3.013	0.654732					47	AcTbO3	0.142689	-3.42733	2.922	0.356567	-3.21345	2.559	0.213878
			22	RbUO3	0.00575382	-3.10823	2.986	0.000460676	-3.11352	3.002	0.00529314					48	CeTmO3	0.208106	-3.51801	2.993	0.422151	-3.30396	1.929	0.214044
			23	YAlO3	0.125435	-3.43426	3.016	0.123165	-3.43653	2.952	0.00227022					49	CuUO3	0.116831	-2.50335	0.88	0.333939	-2.28624	1.051	0.217108
			24	NdAlO3	0.0287938	-3.4838	3.134	0.0277172	-3.48487	2.932	0.00107656					50	GdScO3	0.216862	-3.58315	3.67	0.435204	-3.3648	2.589	0.218342
			25	AcYO3	0.247595	-2.94566	0	0.326158	-3.36782	2.783	0.422164					51	MnZrO3	0.277206	-2.71759	1.487	0.496856	-2.49794	0.411	0.21965
			26	ThBeO3	0.382682	-3.34595	2.574	0.381132	-3.3475	2.753	0.00154951					52	LaTmO3	0.205934	-3.61626	3.353	0.426547	-3.39564	2.127	0.220613
			27	TlUO3	0.0038771	-2.74141	2.695	-0.10831	-2.74528	2.695	0.0038771					53	RbVO3	0.138849	-2.22966	0.39	0.35956	-2.00895	0.265	0.220711
			28	YScO3	0.0809075	-2.60727	1.548	0.494738	-3.31305	2.675	0.705787					54	YCoO3	0.580283	-2.5058	0	0.250549	-2.28032	0.934	0.225484
			29	CsUO3	0.0104028	-3.04444	2.826	0.0100147	-3.04483	2.652	0.000388086					55	MgTiO3	0.25764	-2.93056	2.525	0.487537	-2.70066	1.692	0.229897
			30	NaTaO3	0.0164092	-2.91511	2.546	0.0131588	-2.91836	2.375	0.00325045					56	BiScO3	0.116567	-2.52414	1.603	0.346609	-2.2941	1.049	0.230042
			31	YbSnO3	0.510279	-2.07562	0	0.233187	-2.45256	2.257	0.376937					57	LuGaO3	0.204447	-2.82679	2.968	0.441671	-2.58957	3.12	0.237224
			32	KTaO3	0.000510362	-2.9199	2.356	4.7886e-05	-2.92037	2.192	0.000462476					58	CeErO3	0.218699	-3.48981	2.974	0.458919	-3.24959	1.898	0.24022
			33	BaPuO3	0.0350923	-3.26529	2.12	0.031355	-3.26903	2.138	0.00373729					59	TbScO3	0.232491	-3.45134	3.529	0.47332	-3.21051	2.554	0.240829
			34	InUO3	0.245268	-2.66099	1.792	0.241185	-2.66508	1.969	0.00408364					60	NdLuO3	0.235546	-3.55549	3.183	0.476491	-3.31454	2.148	0.240945
			35	SrTiO3	0.00233289	-3.35124	1.879	0.000908594	-3.35266	1.88	0.0014243					61	AcGdO3	0.149274	-3.53692	2.726	0.392118	-3.29408	2.4	0.242843
			36	AgTaO3	0.0279875	-2.23704	1.876	0.0269461	-2.23808	1.877	0.00104146					62	NpErO3	0.225298	-3.47325	1.521	0.468922	-3.22963	2.108	0.243624
			37	LaCrO3	0.0894269	-3.07866	1.8	0.0854498	-3.08264	1.8	0.0039771					63	LaErO3	0.215241	-3.58935	3.258	0.462954	-3.34164	2.001	0.247714
			38	CeCrO3	0.0890159	-2.99317	1.747	0.0888172	-2.99337	1.752	0.000198716					64	PrTmO3	0.232991	-3.52097	2.929	0.48311	-3.27085	1.833	0.250119
			39	SmCrO3	0.202287	-2.94866	1.918	0.199265	-2.95168	1.721	0.00302237					65	PmInO3	0.225539	-2.5348	2.344	0.488057	-2.27229	1.748	0.262518
			40	YCrO3	0.0456958	-2.25624	0	0.304049	-2.87405	1.69	0.617812					66	CeHoO3	0.227788	-3.46947	2.8	0.490989	-3.20627	1.935	0.263202
			41	BiAlO3	0.124717	-2.26357	1.817	0.122458	-2.26583	1.685	0.00225893					67	NpHoO3	0.22264	-3.45484	1.517	0.492586	-3.18489	1.921	0.269947
			42	AcCrO3	0.0193234	-3.11857	1.671	0.018947	-3.11895	1.666	0.000376414					68	LaHoO3	0.224434	-3.5689	3.207	0.494956	-3.29838	1.977	0.270523
			43	PmCrO3	0.179403	-2.96325	1.677	0.17612	-2.96654	1.664	0.00328229					69	AcSmO3	0.182554	-3.45784	2.564	0.480446	-3.15995	2.345	0.297892
			44	NdCrO3	0.148605	-2.97312	1.816	0.144796	-2.97693	1.632	0.00380927					70	SbGaO3	0.128647	-1.71159	1.364	0.448379	-1.39186	1.211	0.319731
			45	SrSnO3	0.0502014	-2.44495	1.545	0.0472212	-2.44793	1.56	0.00298021
			46	YbGeO3	0.150917	-2.2529	0	0.0787012	-2.60947	1.54	0.35657
			47	YbPuO3	0.249837	-2.92826	2.195	0.415642	-3.0538	1.531	0.125532
			48	EuGeO3	0.0124412	-2.69111	1.195	0.0109192	-2.69263	1.163	0.00152201
			49	UCrO3	0.265394	-2.85343	0.897	0.26058	-2.85824	1.074	0.0048135
			50	AgPaO3	49.5049	47.1786	0	0.113707	-2.21268	1.014	49.3912
			51	CaGeO3	0.0749481	-2.42432	1.204	0.0714671	-2.4278	0.962	0.00348099
			52	LuCoO3	0.471885	-2.1357	0	0.38684	-2.22075	0.905	0.0850455
			53	BaSnO3	0.000936682	-2.44165	0.883	-0.0515295	-2.44259	0.883	0.000936682
			54	PmCoO3	0.139499	-2.33931	0.753	0.134372	-2.34443	0.822	0.00512753
			55	TmCoO3	0.397954	-2.19474	0	0.333501	-2.25919	0.783	0.064453
			56	PrCoO3	0.113923	-2.30148	1.037	0.0711041	-2.3443	0.77	0.0428186
			57	ErCoO3	0.381518	-2.19357	0	0.301632	-2.27346	0.77	0.0798863
			58	LaCoO3	0.113597	-2.3918	0	0.085763	-2.41964	0.524	0.0278343
			59	AcCoO3	0.0123593	-2.41402	0.301	0.0080667	-2.41831	0.454	0.00429256
			60	AcFeO3	0.0258873	-2.705	0.61	0.0234051	-2.70749	0.454	0.00248218
			61	PmFeO3	0.195429	-2.53123	0	0.193035	-2.53362	0.384	0.00239495
			62	NpFeO3	0.263504	-2.57072	0.373	0.260618	-2.57361	0.373	0.0028861
			63	CeFeO3	0.104153	-2.56479	0.341	0.0988629	-2.57008	0.336	0.00528999
			64	SrGeO3	0.148188	-2.42938	0.47	0.143216	-2.43436	0.308	0.00497155
			65	CdGeO3	0.299035	-1.40226	0.407	0.296562	-1.40473	0.271	0.00247226
